# Supplementary material
Source: publisher figshare collection journal article supplement (https://sage.figshare.com/ndownloader/files/13033646)
Supplement: Supplementary file 1 [file 13033646]

**Appendix 2: Computation of weighting factor for L37.5 stage based on similarity with L110 stage;  $c_j=1$ ,  $k_{1j}=0.8$ ,  $k_{2j}=1.2$**

| Sl. No.                            | SRIFs                                                               | Similarity Class | $w_{ij}$ | $ws_j$ | Rationale for the Weighting index of L110                                                                                                                                      |
|------------------------------------|---------------------------------------------------------------------|------------------|----------|--------|--------------------------------------------------------------------------------------------------------------------------------------------------------------------------------|
| <b>Engine Design features</b>      |                                                                     |                  |          |        |                                                                                                                                                                                |
| 1                                  | Engine combustion cycles                                            | I                | 1        | 0.8    | Both engines work with same combustion cycle                                                                                                                                   |
| 2                                  | Engine Start/Shut-off transient hazards                             | I                | 1        | 0.8    | The shut off transients are similar, with either command cut off or U- depletion                                                                                               |
| 3                                  | Propellant specific hazards; and Engine derating / uprating;        | I                | 1        | 0.8    | Same propellant used. All engines operate at same thrust level.                                                                                                                |
| 4                                  | Vehicle and Engine Interface & Interface hazards                    | II               | 0.8      | 0.572  | Differences related to twin engine configuration                                                                                                                               |
| 5                                  | Design Method/Philosophy                                            | II               | 0.8      | 0.572  | Overall engine configuration is same. Stage engineered with twin engine configuration, two independent propellant tanks and double ply throat insert. Design methodology same. |
| 6                                  | Environment (Temp, Load, Pressure, Vibration, shock, acoustic etc.) | III              | 0.4      | 0.051  | Vibration & Acoustic levels are expected to be higher for L110. Thermal environment will also be higher as heat radiated by one engine will be seen by other engine in L110.   |
| 7                                  | Modelling/Analysis Method                                           | I                | 1        | 0.8    | Analysis procedure followed are same.                                                                                                                                          |
| 8                                  | Design Margins                                                      | I                | 1        | 0.8    | Minimum margin of safety for structures, pressure ratings, flexible hoses, plumbing are and other engine subsystems are same.                                                  |
| 9                                  | Total components No. and subsystems                                 | II               | 0.8      | 0.572  | Number of feed lines, gas bottles and interface joints are marginally higher.                                                                                                  |
| 10                                 | Burn duration                                                       | III              | 0.4      | 0.051  | Engine burn duration is substantially higher at 200 seconds as compared to 150 seconds of L37.5 and 160 seconds of L40                                                         |
| 11                                 | Overall Dimensional similarity of critical components               | III              | 0.4      | 0.051  | Changes due to stage systems being different and twin engine configuration                                                                                                     |
| <b>Materials and Manufacturing</b> |                                                                     |                  |          |        |                                                                                                                                                                                |
| 12                                 | Materials used                                                      | I                | 1        | 0.8    | Identical                                                                                                                                                                      |
| 13                                 | Material Property Evaluation Method/Approach                        | I                | 1        | 0.8    | Identical                                                                                                                                                                      |
| 14                                 | Manufacturing Method used                                           | II               | 0.8      | 0.572  | Minor difference                                                                                                                                                               |
| <b>Quality Aspects</b>             |                                                                     |                  |          |        |                                                                                                                                                                                |
| 15                                 | Extent of QA coverage                                               | I                | 1        | 0.8    | Identical                                                                                                                                                                      |
| 16                                 | Extent of QC coverage                                               | I                | 1        | 0.8    | Identical                                                                                                                                                                      |

|                                                        |                                                                   |                                        |     |       |                                                  |
|--------------------------------------------------------|-------------------------------------------------------------------|----------------------------------------|-----|-------|--------------------------------------------------|
| 17                                                     | No. of qualification tests conducted                              | III                                    | 0.4 | 0.051 | Lesser                                           |
| 18                                                     | Matching of qualification test results with analytical prediction | I                                      | 1   | 0.8   | Identical                                        |
| 19                                                     | NC management approach                                            | I                                      | 1   | 0.8   | Identical                                        |
| 20                                                     | No. of major NCs                                                  | I                                      | 1   | 0.8   | Similar                                          |
|                                                        |                                                                   |                                        |     |       |                                                  |
| Sum of values of criticality parameters ( $\sum c_i$ ) |                                                                   | Sum of Weighting Score ( $\sum ws_j$ ) |     |       | Weighting factor $wf = (\sum ws_j) / (\sum c_j)$ |
| 20                                                     |                                                                   | 12.095                                 |     |       | 0.605                                            |

Note:  $c_j=1$ ,  $k_{1j}=0.8$ , and  $k_{2j}=1.2$  for all SRIFs

$ws_j$  computed for each SRIF using equation (5)
